# Supplementary material for: An AAQPR peptide from Aspergillus oryzae-fermented wheat peptone promotes the regenerative potential of dermal and epidermal layers of the skin in in vitro assays and clinical trials
Source: Royal Society of Chemistry journal article supplement (doi:10.1039/d5bm00571j), 2025-01-01
Supplement: d5bm00571j1.pdf [file d5bm00571j1.pdf]

## Supporting Information

AAQPR peptide from *Aspergillus oryzae*-fermented wheat peptone promotes the regenerative potential of dermal and epidermal layers of the skin in in vitro assays and clinical trials

Sae Woong Oh,<sup>†a</sup> Eunbi Yu,<sup>†a</sup> Kitae Kwon,<sup>†a</sup> Hye Ja Lee,<sup>b</sup> Hyun Sook Yeom,<sup>b</sup> Kyung Man Hahm,<sup>\*b</sup> Jin Oh Park,<sup>b</sup> Jae Youl Cho,<sup>\*c</sup> and Jongsung Lee<sup>\*a</sup>

a. Molecular Dermatology Laboratory, Department of Integrative Biotechnology, College of Biotechnology and Bioengineering, Sungkyunkwan University, Suwon City, 16419 Gyunggi Do, Korea, E-mail: [bioneer@skku.edu](mailto:bioneer@skku.edu) (J.L.)

b. Natural Products Laboratory, Daebong LS Co., Ltd., 21697 Incheon, Korea, E-mail: [project@daebongls.co.kr](mailto:project@daebongls.co.kr) (K.M.H.)

c. Molecular Immunology Laboratory, Department of Integrative Biotechnology, College of Biotechnology and Bioengineering, Sungkyunkwan University, Suwon City, 16419 Gyunggi Do, Korea, E-mail: [jaecho@skku.edu](mailto:jaecho@skku.edu) (J.Y.C.).

<sup>†</sup> These authors contributed equally to this work.

\* Corresponding authors: [bioneer@skku.edu](mailto:bioneer@skku.edu) (J.L.), [jaecho@skku.edu](mailto:jaecho@skku.edu) (J.Y.C.), [project@daebongls.co.kr](mailto:project@daebongls.co.kr) (K.M.H.).

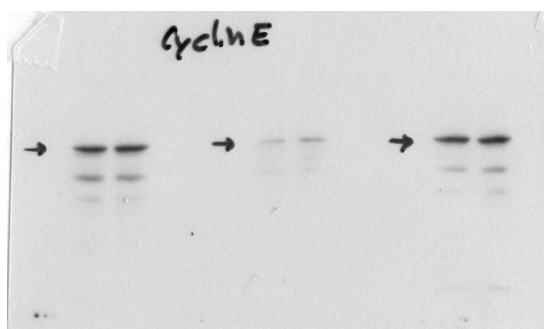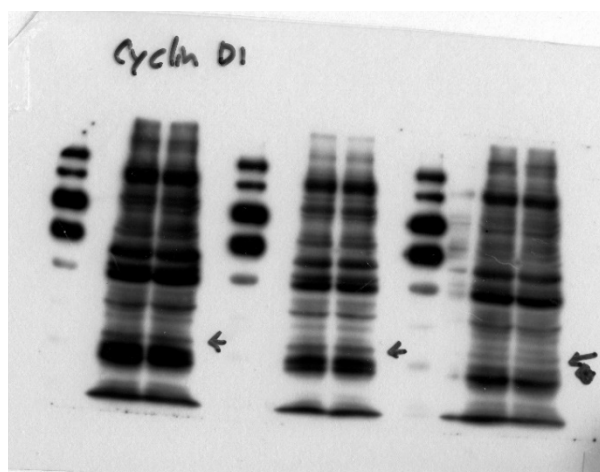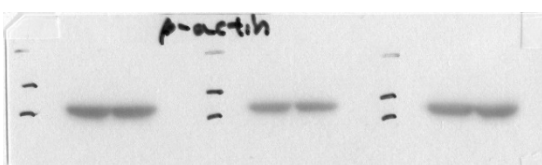

Supporting figures

Full blot of immunoblot in Fig. 1D

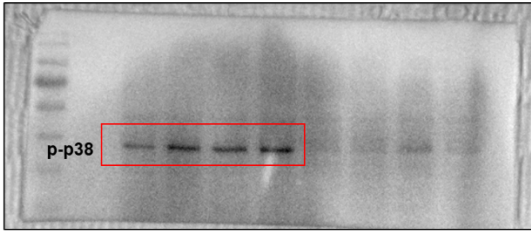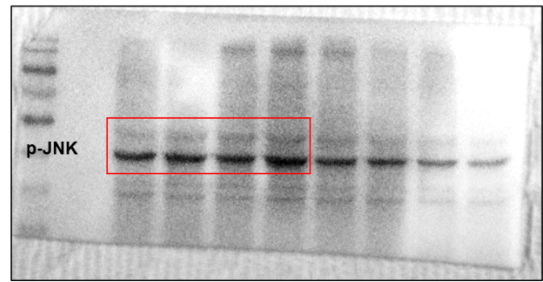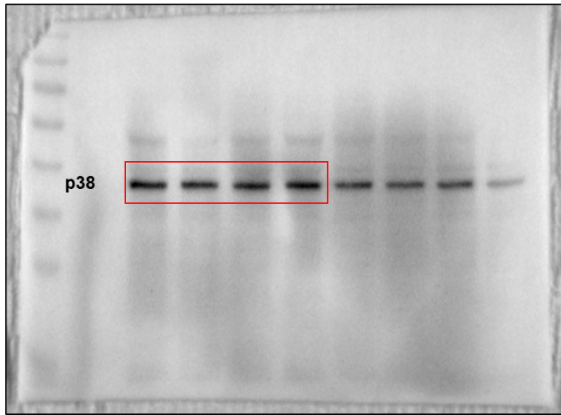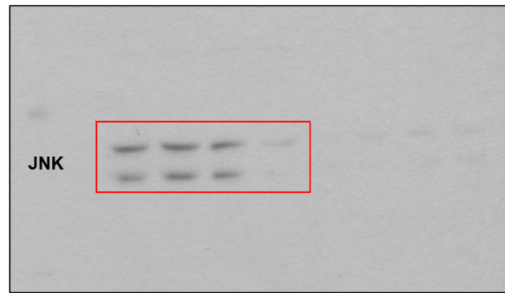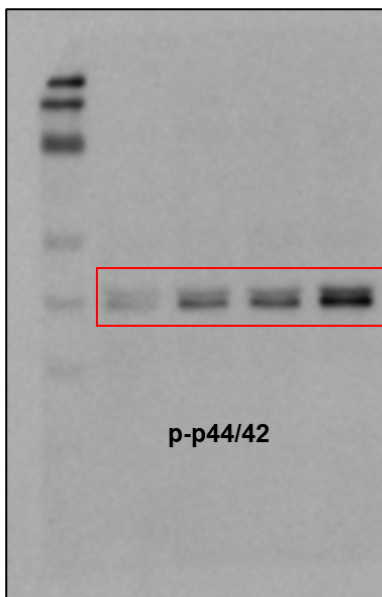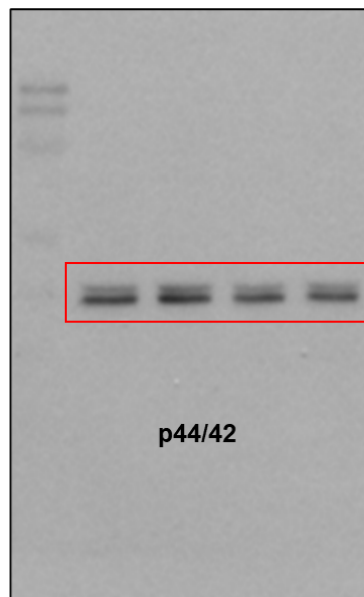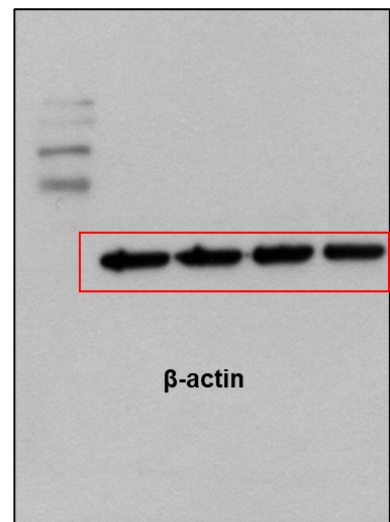

1E

original image

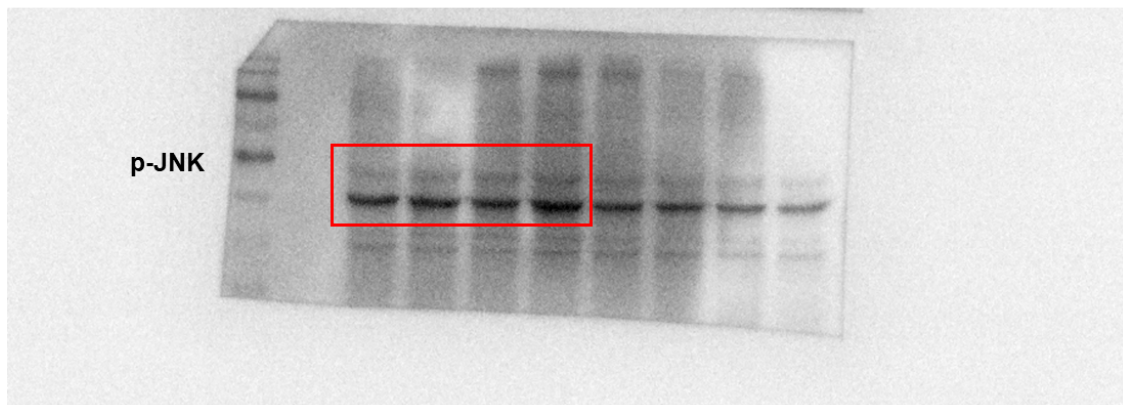

marker image

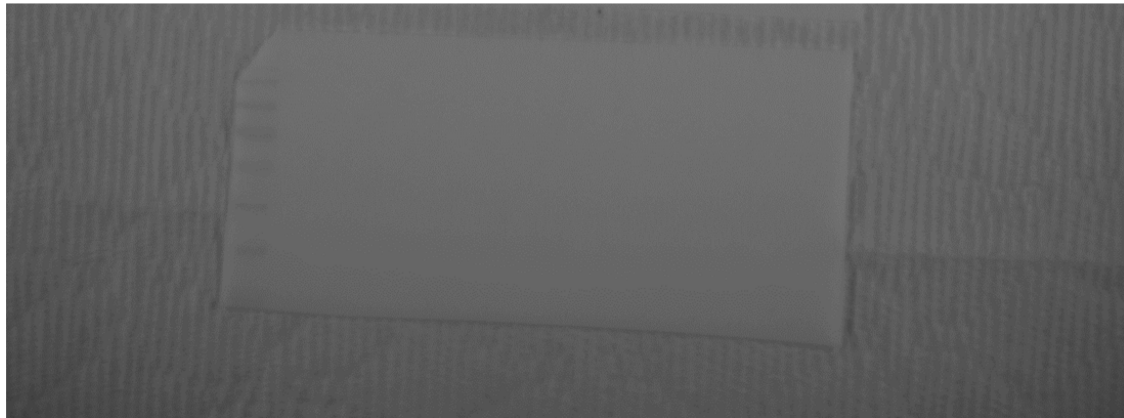

merge image

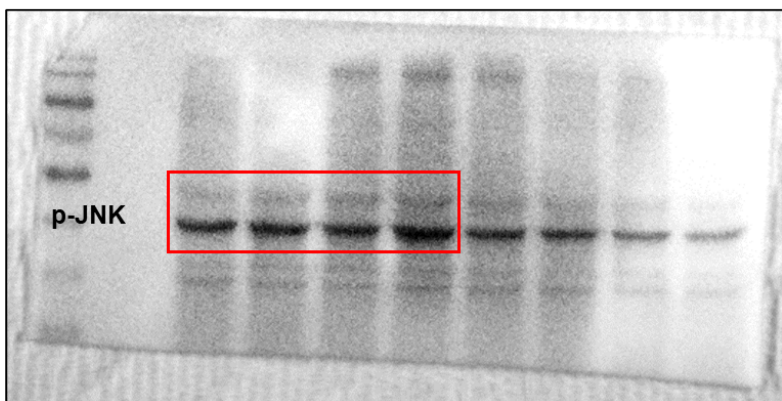

Supporting figures

Full blot of immunoblot in Fig. 1E

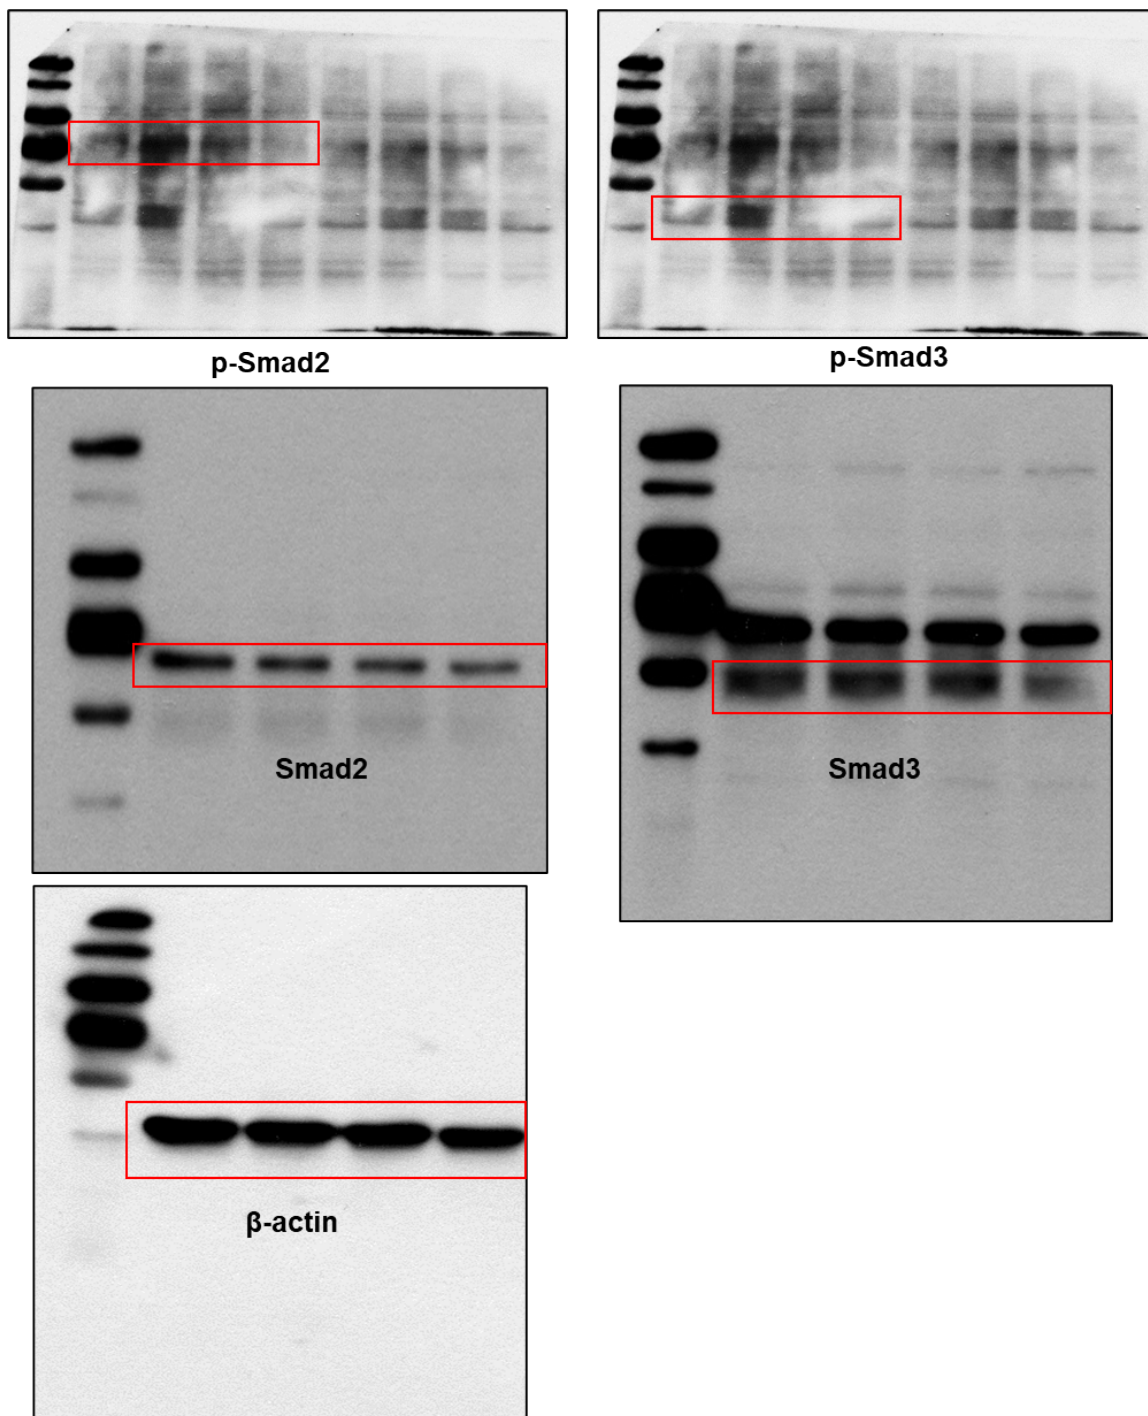

Supporting figures

Full blot of immunoblot in Fig. 2B

|                              |                                      |      |      |      |   |   |   |   |   |   |    |    |    |
|------------------------------|--------------------------------------|------|------|------|---|---|---|---|---|---|----|----|----|
| Software Version             | 3.10.06                              |      |      |      |   |   |   |   |   |   |    |    |    |
| Experiment File Path:        |                                      |      |      |      |   |   |   |   |   |   |    |    |    |
| Protocol File Path:          |                                      |      |      |      |   |   |   |   |   |   |    |    |    |
| Plate Number                 | Plate 1                              |      |      |      |   |   |   |   |   |   |    |    |    |
| Date                         | 2024-11-27                           |      |      |      |   |   |   |   |   |   |    |    |    |
| Time                         | 오후 3:50:33                           |      |      |      |   |   |   |   |   |   |    |    |    |
| Reader Type:                 | Synergy HTX                          |      |      |      |   |   |   |   |   |   |    |    |    |
| Reader Serial Number:        | 151016E                              |      |      |      |   |   |   |   |   |   |    |    |    |
| Reading Type                 | Reader                               |      |      |      |   |   |   |   |   |   |    |    |    |
| <b>Procedure Details</b>     |                                      |      |      |      |   |   |   |   |   |   |    |    |    |
| Plate Type                   | 96 WELL PLATE (Use plate lid)        |      |      |      |   |   |   |   |   |   |    |    |    |
| Eject plate on completion    |                                      |      |      |      |   |   |   |   |   |   |    |    |    |
| Delay                        | 0:10:00 (HH:MM:SS)                   |      |      |      |   |   |   |   |   |   |    |    |    |
| Read                         | Luminescence Endpoint                |      |      |      |   |   |   |   |   |   |    |    |    |
|                              | A1..D4                               |      |      |      |   |   |   |   |   |   |    |    |    |
|                              | Integration Time: 0:01.00 (MM:SS.ss) |      |      |      |   |   |   |   |   |   |    |    |    |
|                              | Filter Set 1                         |      |      |      |   |   |   |   |   |   |    |    |    |
|                              | Emission: Hole                       |      |      |      |   |   |   |   |   |   |    |    |    |
|                              | Optics: Top, Gain: AutoScale         |      |      |      |   |   |   |   |   |   |    |    |    |
|                              | Filter Set 2                         |      |      |      |   |   |   |   |   |   |    |    |    |
|                              | Emission: Hole                       |      |      |      |   |   |   |   |   |   |    |    |    |
|                              | Optics: Top, Gain: 100               |      |      |      |   |   |   |   |   |   |    |    |    |
|                              | Read Speed: Normal, Delay: 100 msec  |      |      |      |   |   |   |   |   |   |    |    |    |
|                              | Extended Dynamic Range               |      |      |      |   |   |   |   |   |   |    |    |    |
|                              | Read Height: 4.5 mm                  |      |      |      |   |   |   |   |   |   |    |    |    |
| <b>Automatic gain values</b> |                                      |      |      |      |   |   |   |   |   |   |    |    |    |
| Gain(Lum)                    | 189                                  |      |      |      |   |   |   |   |   |   |    |    |    |
| <b>Results</b>               |                                      |      |      |      |   |   |   |   |   |   |    |    |    |
| Actual Temperature:          | 25.2                                 |      |      |      |   |   |   |   |   |   |    |    |    |
| Actual Temperature:          | 25.2                                 |      |      |      |   |   |   |   |   |   |    |    |    |
|                              |                                      | 1    | 2    | 3    | 4 | 5 | 6 | 7 | 8 | 9 | 10 | 11 | 12 |
| control                      | A                                    | 4345 | 4660 | 4571 |   |   |   |   |   |   |    |    |    |
| PEP5                         | B                                    | 5063 | 4808 | 4909 |   |   |   |   |   |   |    |    |    |
| PEP5+SB                      | C                                    | 4661 | 5102 | 4806 |   |   |   |   |   |   |    |    |    |
| SB                           | D                                    | 4564 | 4695 | 4561 |   |   |   |   |   |   |    |    |    |
|                              | E                                    |      |      |      |   |   |   |   |   |   |    |    |    |
|                              | F                                    |      |      |      |   |   |   |   |   |   |    |    |    |
|                              | G                                    |      |      |      |   |   |   |   |   |   |    |    |    |
|                              | H                                    |      |      |      |   |   |   |   |   |   |    |    |    |

Supporting figures

Raw data of cell viability in Fig. 2C

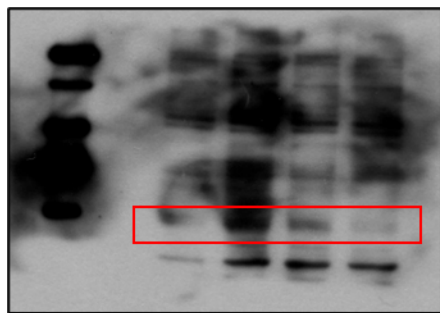

**p-Smad 2**

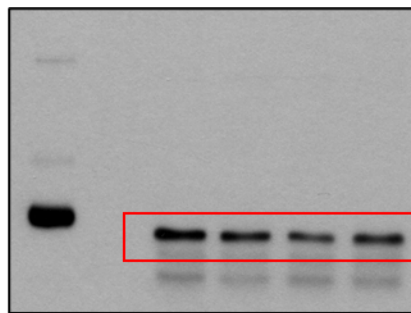

**Smad 2**

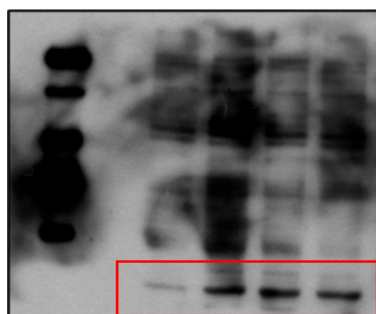

**p-Smad 3**

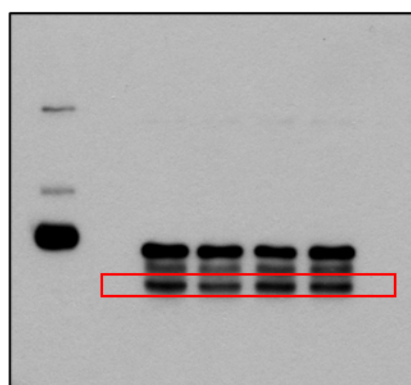

**Smad 3**

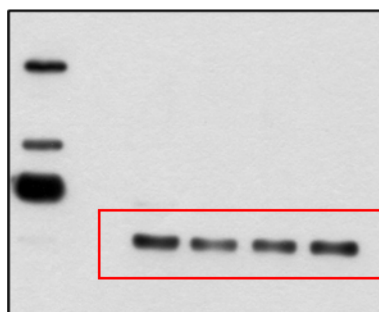

**$\beta$ -actin**

Supporting figures

Full blot of immunoblot in Fig. 2D

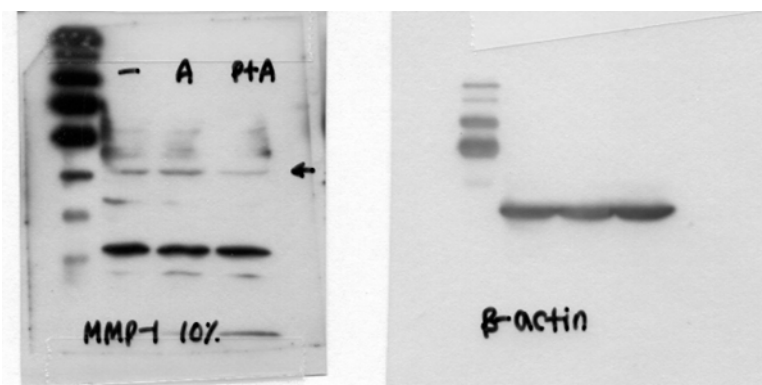

Supporting figures

Full blot of immunoblot in Fig. 5B



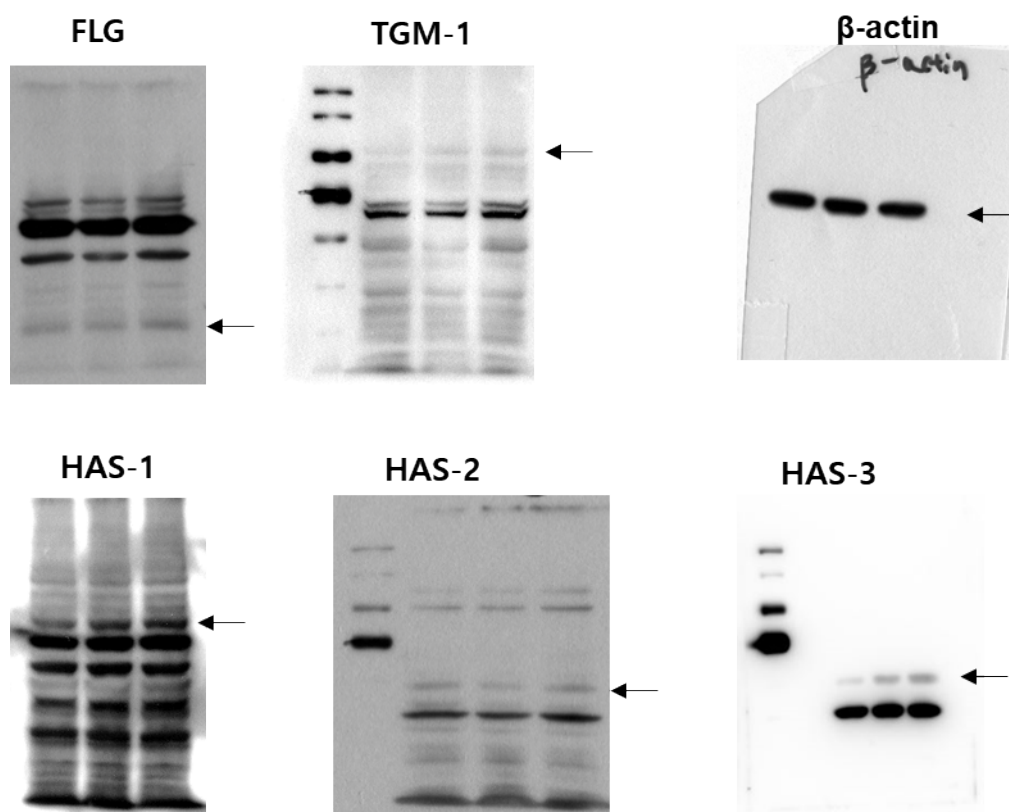

Supporting figures

Full blot of immunoblot in Fig. 6B

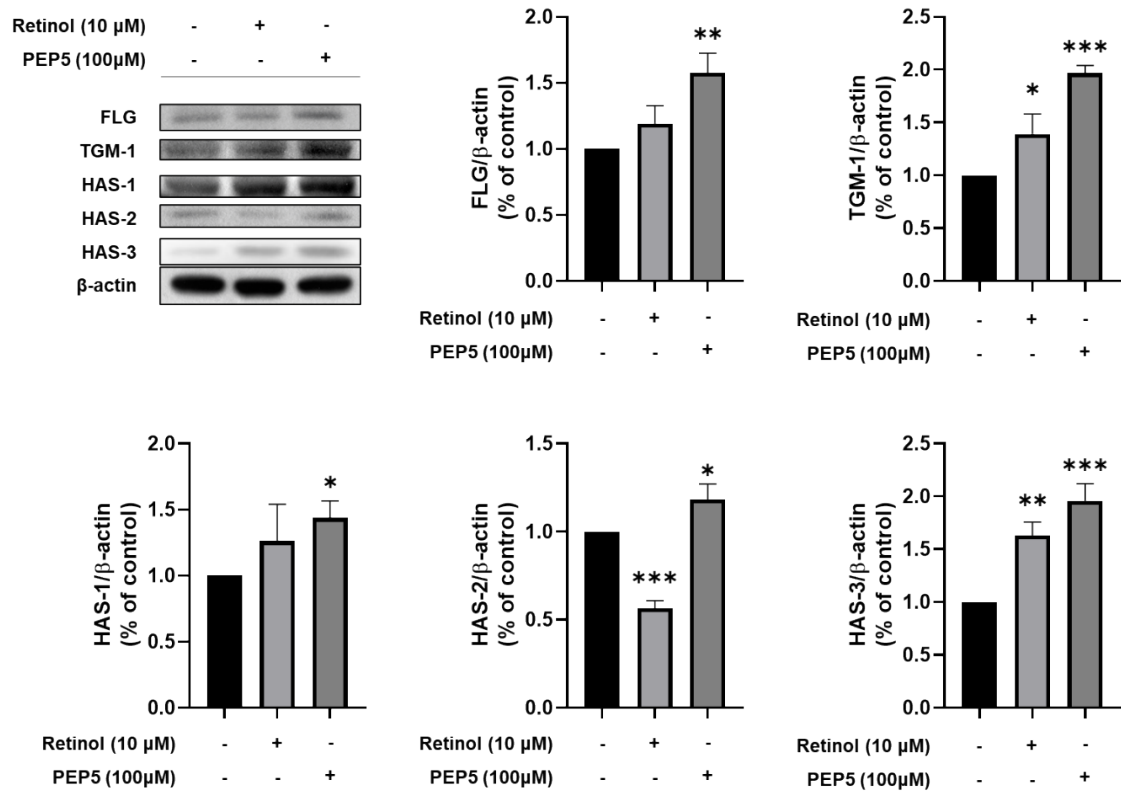

Supporting figures

Densitometric analysis of immunoblot in Fig. 6B

### Supplementary Figure 1 and Table 3

To investigate the sequence relationships among bioactive peptides, a peptide library was constructed based on curated antioxidative peptide sequences obtained from the BIOPEP-UWM database.<sup>1</sup> The peptide sequences were aligned using Clustal Omega, which applies a progressive alignment strategy guided by a distance-based tree constructed via the mBed embedding method.<sup>2</sup> This approach enables efficient handling of large datasets by reducing the computational complexity to  $O(N \log N)$ , while maintaining high alignment accuracy through the use of profile-profile comparisons based on Hidden Markov Models. The resulting multiple sequence alignment was used to generate a phylogenetic tree in Newick format, from which peptides closely clustered with PEP5 (AAQPR) were identified and compared. Additionally, a motif similar to AAQPR was cross-referenced against known protein databases to evaluate its presence in natural sources, such as wheat-derived proteins, for biological relevance. Furthermore, protein sequences derived from *Triticum aestivum* (bread wheat, Taxonomy ID: 4565) were screened to identify entries containing the AAQPR motif. These proteins were then subjected to multiple sequence alignment and phylogenetic analysis alongside the functional peptide library to assess their evolutionary proximity to known antioxidative peptides.

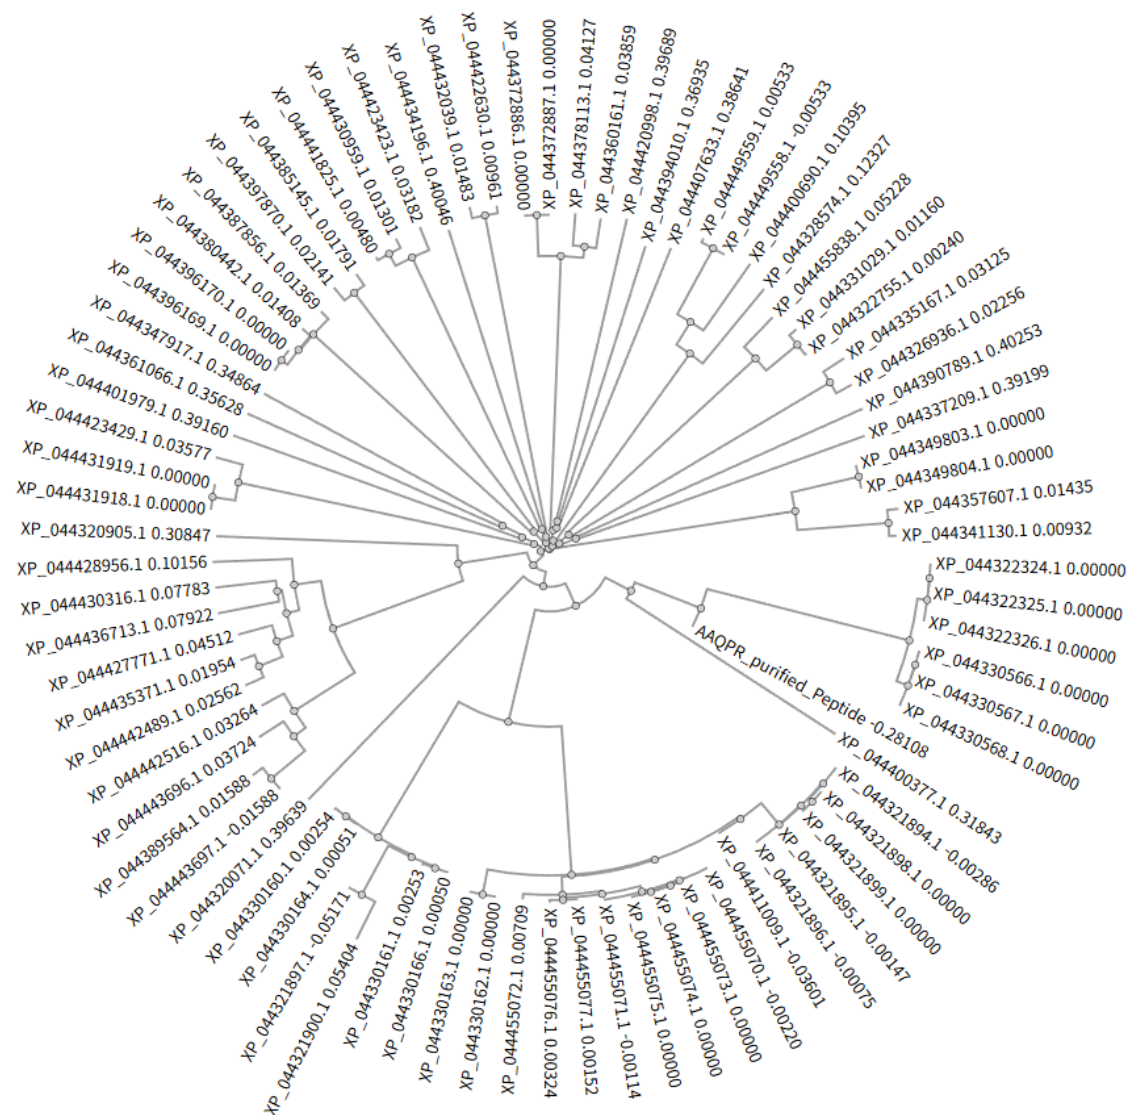

**Supplementary Fig. 1**

Phylogenetic tree of *Triticum aestivum* proteins containing the AAQPR motif. Protein sequences derived from the *Triticum aestivum* genome (Taxonomy ID: 4565) were screened to identify entries containing the AAQPR peptide sequence. These proteins were aligned using Clustal Omega, and a phylogenetic tree was constructed to evaluate their evolutionary relationships.

## Supporting Table

Supplementary Table 1

| Item                                                                       | Category                | Frequency (number) | %      |
|----------------------------------------------------------------------------|-------------------------|--------------------|--------|
| Number of subjects at onset                                                | Male                    | 19                 | 100    |
|                                                                            | Female                  | 0                  | 0      |
| Skin type                                                                  | Dry                     | 4                  | 21.05  |
|                                                                            | Normal to dry           | 5                  | 26.23  |
|                                                                            | Normal                  | 4                  | 21.05  |
|                                                                            | Normal to oily          | 5                  | 26.32  |
|                                                                            | Oily                    | 1                  | 5.26   |
| Skin moisture concentration                                                | Very high               | 2                  | 10.53  |
|                                                                            | Slightly high           | 1                  | 5.26   |
|                                                                            | Moderate                | 6                  | 31.58  |
|                                                                            | Slightly low            | 9                  | 47.37  |
|                                                                            | Very low                | 1                  | 5.26   |
| Skin surface sebum                                                         | Very high               | 1                  | 5.26   |
|                                                                            | Slightly high           | 3                  | 15.79  |
|                                                                            | Moderate                | 8                  | 42.11  |
|                                                                            | Slightly low            | 7                  | 36.84  |
|                                                                            | Very low                | 0                  | 0.00   |
| Skin elasticity                                                            | No elasticity           | 7                  | 36.84  |
|                                                                            | Moderate                | 9                  | 47.37  |
|                                                                            | elasticity              | 3                  | 15.79  |
| Sleep time (average per day)                                               | less than 5 hours       | 4                  | 21.05  |
|                                                                            | 5~8 hours               | 15                 | 78.95  |
|                                                                            | More than 8 hours       | 0                  | 0.0    |
| Skin exposure to sunlight (hours)                                          | less than 1 hours       | 11                 | 57.89  |
|                                                                            | 1~3 hours               | 7                  | 38.84  |
|                                                                            | More than 3 hours       | 1                  | 5.26   |
| Smoking status (average per day)                                           | Don't smoke             | 19                 | 100.00 |
|                                                                            | Less than 10 cigarettes | 0                  | 0.00   |
|                                                                            | More than 10 cigarettes | 0                  | 0.00   |
|                                                                            | More than one pack      | 0                  | 0.00   |
| Does the skin feel easily irritated?                                       | Yes                     | 4                  | 21.05  |
|                                                                            | No                      | 15                 | 78.95  |
| Does the skin feel stinging within 30 min of product use?                  | Yes                     | 0                  | 0.00   |
|                                                                            | No                      | 19                 | 100.00 |
| Have you experienced a side effect of cosmetics within the past 12 months? | Yes                     | 0                  | 0.00   |
|                                                                            | No                      | 19                 | 100.00 |

Supplementary Table 2

| Reaction temperature | 0 week | 1 week | 3 week | 4 week |
|----------------------|--------|--------|--------|--------|
| 25°C                 | 97.6 % | 96.9 % | 94.3 % | 94.5 % |
| 50°C                 | 97.6 % | 95.3 % | 93.9 % | 95.6 % |

Supplementary Table 3

| BIOPE<br>P ID | Name                                                                              | Sequence    | Chem.<br>mass | Monois.<br>mass | Activity      |
|---------------|-----------------------------------------------------------------------------------|-------------|---------------|-----------------|---------------|
| 8116          | peptide derived from sardinelle by-products proteins ( <i>Sardinella aurita</i> ) | GAWA        | 403.4313      | 403.1850        | antioxidative |
| 9098          | Antioxidative peptide                                                             | GLTSK       | 504.5761      | 504.2898        | antioxidative |
| 9364          | Antioxidative peptide                                                             | DYK         | 424.4471      | 424.1951        | antioxidative |
| 9368          | Antioxidative peptide                                                             | EQC         | 378.4016      | 378.1204        | antioxidative |
| 9436          | Antioxidative peptide                                                             | IIAPPER     | 794.9360      | 794.4636        | antioxidative |
| 9439          | Antioxidative peptide                                                             | KVEGDLK     | 787.8988      | 787.4425        | antioxidative |
| 10471         | Antioxidative peptide                                                             | YF          | 328.3616      | 328.1418        | antioxidative |
| 10769         | Antioxidative peptide                                                             | GVPY        | 434.4849      | 434.2158        | antioxidative |
| 10866         | Antioxidative peptide                                                             | VNPESQQGSPR | 1198.2402     | 1197.5720       | antioxidative |
| 10936         | Antioxidative peptide                                                             | WAAWGIS~    | 788.8903      | 788.3958        | antioxidative |

Supplementary Table 4

| Sample             | Number of<br>respondents | Degree of skin<br>response |      | Average<br>degreeof<br>skin<br>response* | Evaluatio<br>n     |
|--------------------|--------------------------|----------------------------|------|------------------------------------------|--------------------|
|                    |                          | 30min                      | 24hr |                                          |                    |
| PEP5 Essence       | 0                        | 0                          | 0    | 0                                        | No<br>irritation   |
| Control<br>Essence | 1                        | 0                          | 1    | 0.3906                                   | Mild<br>irritation |
| Distilled<br>Water | 0                        | 0                          | 0    | 0                                        | No<br>irritation   |

\* Average degreeof skin response = sum of each skin reactivity) / 2

- Test subject : 32 people (39.0±11.36 years old)

- Test area: The back (except dorsal spine area)

## Reference

1. P. Minkiewicz, A. Iwaniak and M. Darewicz, *International journal of molecular sciences*, 2019, **20**, 5978.
2. F. Sievers, A. Wilm, D. Dineen, T. J. Gibson, K. Karplus, W. Li, R. Lopez, H. McWilliam, M. Remmert and J. Söding, *Molecular systems biology*, 2011, **7**, 539.
